# Supplementary material
Source: publisher figshare collection journal article supplement (https://geolsoc.figshare.com/ndownloader/files/12296798)
Supplement: Supplementary file 1 [file 12296798]

## Sheet: whole rock
Table 5. Whole-rock major and trace element compositions of the Aladag peridotites and chromitites
Lithology	Harzburgite									Mantle dunite
Sample	13YALA-3-2	13YALA-3-3	13YALA-3-4	13YALA-3-5	13YALA-3-6	13YALA-3-7	13YALA-3-8	13YALA-3-8R		13YALA-3-9	13YALA-3-10	GBW07102 Meas.	GBW07102 Rec.	GBW07105 Meas.	GBW07105 Recs.
Major oxides (wt. %)
SiO2	39.74	41.21	39.04	39.59	41.44	40.28	40.35	40.57		35.43	34.32	37.47	37.75	44.3	44.64
TiO2	b.d.	b.d.	b.d.	b.d.	b.d.	b.d.	b.d.	b.d.		b.d.	b.d.	0.01	0.004	2.38
Al2O3	0.52	0.54	0.43	0.5	0.48	0.5	0.51	0.51		0.43	0.6	0.24	0.21	13.7	13.83
Fe2O3	4.94	3.45	4.24	4.87	4.42	3.98	3.59	3.57		3.69	4.01	5.68	4.85	5.14	-
FeO	2.35	3.69	3.13	2.42	2.78	3.28	3.67	n.m.		4.37	4.1	n.m.	-	n.m.	-
MnO	0.11	0.11	0.11	0.11	0.11	0.11	0.11	0.11		0.11	0.11	0.1	0.097	0.17	-
MgO	40.1	41.09	40.94	40.05	39.8	40.76	41.17	41.36		42.88	42.17	37.93	38.34	7.6	7.77
CaO	0.43	0.51	0.41	0.47	0.52	0.47	0.49	0.49		0.18	0.16	1.86	1.8	8.93	8.81
Na2O	b.d.	b.d.	b.d.	b.d.	b.d.	b.d.	b.d.	b.d.		b.d.	b.d.	b.d.	0.028	3.33	3.38
K2O	b.d.	b.d.	b.d.	b.d.	b.d.	b.d.	b.d.	b.d.		b.d.	b.d.	0.01	0.009	2.29	2.32
CO2	0.35	0.24	0.31	0.26	0.05	0.1	0.38	n.m.		0.38	0.47	n.m.	-	n.m.	-
H2O+	10.81	8.24	10.38	10.98	9.77	9.64	8.72	n.m.		11.1	13.04	n.m.	-	n.m.	-
Total	99.35	99.08	98.99	99.25	99.37	99.12	98.99			98.57	98.98	-	-	-	-
Trace elements (ppm)
Sc	7.42063	8.22526	7.49988	7.55723	8.19385	7.74462	7.75544	8.23307		5.44	5.38	4.844	4.8	14.336	15.2
V	30.4595	33.3862	28.6872	30.2547	31.9	30.9829	31.8956	31.978		25.6	33.4	16.388	-	166.196	167
Cr	2809.83	2967.57	2899.13	2895.72	2868.11	3178.97	3009.06	2911.7		6294.74	8757.89	2925.82	-	134.651	134
Co	104.661	96.9376	106.261	98.4246	95.5774	102.845	100.082	104.836		148	145	103.621	-	47.199	46.5
Ni	2019.74	1982.49	2240.63	2038.47	2058.91	2149.58	2150.2	2096.04		2435.92	2435.92	2207.87	-	141.462	140
Cu	2.10652	2.97171	2.03249	2.22272	2.25504	2.79499	2.73193	2.82183		57.5	126	4.436	5.3	46.09	49
Zn	39.6512	39.8393	42.6945	41.3157	39.8692	41.006	42.5575	44.1025		58	63.3	44.687	43.6	148.218	150
Rb	0.0556332	0.159154	0.0927452	0.0816707	0.105052	0.119556	0.101963	0.10551		b.d.	0.13	0.387	-	38.923	37
Ba	0.429144	5.00631	0.383398	0.59944	0.531458	0.740036	0.288128	0.290373		0.34	1.22	7.092	10.5	539.612	527
Th	0.00788072	0.234093	0.00685081	0.0129245	0.00354053	0.0552422	0.0117347	0.00612092		b.d.	b.d.	0.031	-	5.804	6
U	0.00827821	0.0122042	0.00917786	0.0046741	0.00597967	0.00726104	0.006175	0.00956225		b.d.	b.d.	0.237	-	1.303	1.4
Nb	0.0176452	0.00366152	0.0154722	0.00424026	0.00373961	0.0116482	0.0106862	0.00537672		b.d.	b.d.	0.087	-	67.642	68
Ta	0.00597559	0.00477107	0.00494349	0.00673514	0.0045829	0.00692328	0.00167584	0.000627452		b.d.	b.d.	0.004	-	4.314	4.3
La	0.00792041	0.198663	0.0103257	0.0051916	0.0151888	0.0338419	0.00619302	0.0154161		b.d.	b.d.	0.204	0.21	55.833	56
Ce	0.123957	0.181596	0.0683826	0.0290369	0.0460498	0.112829	0.0831857	0.0337703		b.d.	b.d.	0.395	0.4	108.052	105
Pr	0.02269	0.0621388	0.0116799	0.0034146	0.00557862	0.0136383	0.0129515	0.00366611		b.d.	b.d.	0.044	0.047	12.343	13.2
Sr	0.517718	0.71144	0.365676	0.767177	0.400755	0.796277	0.237555	0.273468		0.24	0.39	32.091	33.2	1211.98	1100
Nd	0.0358017	0.243301	0.0340149	0.00582936	0.00426444	0.0567293	0.00828776	0.0221198		b.d.	b.d.	0.183	0.18	52.711	54
Zr	0.0347748	0.0420064	0.0491713	0.0238175	0.0425613	0.0737105	0.0393338	0.053177		0.08	0.2	0.319	-	279.939	277
Hf	0.00525554	0.000578449	0.00436874	b.d.	0.000927942	0.00266083	0.0118384	b.d.		b.d.	b.d.	0.005	-	6.548	6.55
Sm	b.d.	0.0654861	0.010658	0.00574488	0.00167205	0.00603651	b.d.	0.00814313		b.d.	b.d.	0.03	0.028	10.225	10.2
Eu	0.000696057	0.017665	b.d.	0.00504588	0.000736398	0.00443023	b.d.	b.d.		b.d.	b.d.	0.005	0.0061	3.321	3.2
Gd	0.014471	0.107355	0.000628594	b.d.	0.0212834	0.0368785	0.00508356	0.0123245		b.d.	b.d.	0.02	0.31	9.18	8.5
Tb	0.00289712	0.0184237	0.0011915	0.00204036	0.00302397	0.00831899	0.00266006	0.00259816		b.d.	b.d.	0.006	0.003	1.17	1.5
Dy	0.00551567	0.182975	b.d.	0.00346577	0.011934	0.0209475	0.00428321	0.0184408		b.d.	b.d.	0.03	0.021	5.429	5.6
Y	0.020372	1.35951	0.0283866	0.0247976	0.0478189	0.161053	0.0255911	0.0324872		b.d.	b.d.	0.08	0.14	21.842	22
Ho	0.00444481	0.0432939	b.d.	0.00103367	b.d.	0.00732133	0.00378997	b.d.		b.d.	b.d.	0.005	0.0043	0.897	0.88
Er	0.00794815	0.154911	0.00654774	0.015501	0.00689958	0.0250459	0.011273	0.00293103		b.d.	b.d.	0.012	0.012	1.999	2
Tm	0.00174946	0.0314716	0.00129853	0.00122775	0.00223674	0.00387566	0.00144164	0.00273235		b.d.	b.d.	0.003	0.0028	0.228	0.28
Yb	0.0153613	0.170087	0.00507947	b.d.	b.d.	0.0152254	0.00965095	0.00816388		b.d.	b.d.	0.011	0.12	1.22	1.5
Lu	0.00325598	0.0303168	0.00184711	0.00172664	0.00196214	0.00687259	0.000677282	b.d.		b.d.	b.d.	b.d.	0.0022	0.168	0.19
Pb	0.102368	0.270193	0.101556	0.0935954	0.0978933	0.174834	0.0964852	0.0964633		b.d.	0.19	1.529	3.2	4.21	7
PGE (ppb)
Os	5.42	6.1	6.06	5.96	5.4	5.71	5.6	5.24		4.99	7.07	n.m.	-	n.m.	-
Ir	2.83	3.5	3.08	4.1	3.37	2.69	4.58	3.02		1.72	2.6	n.m.	-	n.m.	-
Ru	5.51	6.06	5.43	6.3	5.75	6.36	11.3	10.4		3.5	4.36	n.m.	-	n.m.	-
Rh	1.09	1.16	0.88	1.19	2.19	1	2.27	1.65		1.6	2.05	n.m.	-	n.m.	-
Pt	5.49	6.32	11.2	5.75	7.64	4.48	8.82	7.21		28.3	37	n.m.	-	n.m.	-
Pd	11.4	0.76	1.07	2.43	2.79	4.57	1.77	1.47		97.5	104	n.m.	-	n.m.	-
Lithology	MTZ chromitite							Mantle chromitite
Sample	13YALA-1-3	13YALA-1-4	13YALA-1-7	13YALA-1-8	13YALA-1-10	13YALA-1-11		13YALA-15-4	13YALA-15-5	13YALA-15-6	13YALA-15-10	13YALA-15-11	13YALA-15-15	13YALA-15-16	13YALA-15-17	GBW07105 Meas.	GBW07105 Recs.
Major oxides (wt. %)
SiO2	29.78	27.96	26.21	33.49	26.6	26.91		3.14	3.8	8.03	5.01	2.81	9.49	8.43	9.19	n.m.	-
TiO2	0.03	0.04	0.05	0.01	0.06	0.05		0.11	0.1	0.14	0.1	0.11	0.14	0.13	0.13	n.m.	-
Al2O3	1.68	2.29	2.88	0.36	2.62	2.5		10.48	10.32	9.2	9.58	10.44	8.22	8.56	8.33	n.m.	-
Cr2O3	8.65	11.57	16.77	1.86	12.87	12.61		54.82	53.3	46.86	51.36	54.42	44.49	45.85	45.38	n.m.	-
Fe2O3	2.9	2.77	5.5	2.96	3.25	3.16		5.52	6.45	5.15	7.85	6.66	4.66	5.09	5.01	n.m.	-
FeO	4.14	4.81	3.36	3.05	5.02	4.68		8.9	7.55	7.86	6.24	7.55	8.45	8.36	8.59	n.m.	-
MnO	0.1	0.1	0.11	0.09	0.11	0.1		0.16	0.16	0.14	0.15	0.16	0.16	0.15	0.15	n.m.	-
MgO	39.06	36.48	31.55	42.4	35.73	35.93		15.54	16.1	19.24	17.53	16.25	20.23	19.6	19.17	n.m.	-
CaO	0.14	0.1	0.12	0.2	0.14	0.12		0.11	0.13	b.d.	b.d.	b.d.	0.06	b.d.	0.07	n.m.	-
Na2O	b.d.	b.d.	b.d.	b.d.	b.d.	b.d.		b.d.	b.d.	b.d.	b.d.	b.d.	b.d.	b.d.	b.d.	n.m.	-
K2O	b.d.	b.d.	b.d.	b.d.	b.d.	b.d.		b.d.	b.d.	b.d.	b.d.	b.d.	b.d.	b.d.	b.d.	n.m.	-
NiO	0.32	0.31	0.29	0.34	0.28	0.31		0.17	0.16	0.22	0.18	0.16	0.2	0.2	0.17	n.m.	-
CO2	0.47	0.5	0.78	0.6	0.47	0.69		0.26	0.24	0.31	0.29	0.33	0.16	0.29	0.24	n.m.	-
H2O+	13.1	12.66	12.16	14.7	12.38	12.48		1.24	1.68	3.18	2.28	1.5	3.76	3.32	3.58	n.m.	-
Total	100.37	99.59	99.78	100.06	72.93	72.63		99.21	98.31	97.15	98.29	98.89	96.26	96.66	96.43	n.m.	-
Trace elements (ppm)
Sc	3.65	3.76	3.98	3.51	4.21	4.04		7.34	8.53	6.32	7.56	8.3	6.51	6.38	6.08	n.m.	-
V	91.9	126	168	16.9	143	137		600	668	515	573	704	478	500	438	n.m.	-
Co	126	143	162	122	151	149		225	246	212	238	271	225	233	214	n.m.	-
Cu	13	39.5	14.5	14.3	16.3	17		88.3	55.8	43.3	35.8	28.5	24.8	18.5	19.6	n.m.	-
Zn	70.4	86.6	120	38.6	102	93.5		266	295	209	262	307	238	245	224	n.m.	-
Rb	0.14	0.16	0.16	0.07	0.11	0.11		0.93	0.9	0.7	0.96	1.06	0.75	0.81	0.71	n.m.	-
Ba	0.76	0.93	1.76	0.66	0.62	4.86		5.6	6.89	1.94	3.35	1.42	3.66	1.14	0.81	n.m.	-
Th	b.d.	b.d.	b.d.	b.d.	b.d.	b.d.		0.05	0.09	0.07	b.d.	b.d.	b.d.	b.d.	b.d.	n.m.	-
U	b.d.	b.d.	b.d.	b.d.	b.d.	b.d.		b.d.	b.d.	b.d.	b.d.	b.d.	b.d.	b.d.	b.d.	n.m.	-
Nb	0.17	0.23	0.31	b.d.	0.23	0.24		0.96	0.98	0.81	0.87	0.95	0.72	0.71	0.62	n.m.	-
Ta	b.d.	b.d.	b.d.	b.d.	b.d.	b.d.		b.d.	b.d.	b.d.	b.d.	b.d.	b.d.	b.d.	b.d.	n.m.	-
La	b.d.	b.d.	b.d.	b.d.	b.d.	0.07		0.15	0.22	0.14	0.06	b.d.	0.33	0.05	b.d.	n.m.	-
Ce	0.06	0.07	0.07	b.d.	0.05	0.09		0.27	0.22	0.11	0.1	b.d.	0.28	0.06	b.d.	n.m.	-
Pr	b.d.	b.d.	b.d.	b.d.	b.d.	b.d.		b.d.	b.d.	b.d.	b.d.	b.d.	0.08	b.d.	b.d.	n.m.	-
Sr	0.41	0.38	1.97	1.36	0.41	0.79		2.47	2.27	1.17	1.92	1.23	1.58	0.53	0.39	n.m.	-
Nd	b.d.	b.d.	b.d.	b.d.	b.d.	0.07		0.14	0.21	0.15	0.06	<0.05	0.33	b.d.	b.d.	n.m.	-
Zr	0.18	0.26	0.32	0.15	0.24	0.28		0.81	0.77	0.53	0.72	0.64	0.51	0.48	0.44	n.m.	-
Hf	b.d.	b.d.	b.d.	b.d.	b.d.	b.d.		b.d.	b.d.	b.d.	b.d.	b.d.	b.d.	b.d.	b.d.	n.m.	-
Sm	b.d.	b.d.	b.d.	b.d.	b.d.	b.d.		0.14	0.2	0.14	0.17	0.27	0.21	0.15	0.12	n.m.	-
Eu	b.d.	b.d.	b.d.	b.d.	b.d.	b.d.		b.d.	b.d.	b.d.	b.d.	b.d.	b.d.	b.d.	b.d.	n.m.	-
Gd	b.d.	b.d.	b.d.	b.d.	b.d.	b.d.		b.d.	b.d.	b.d.	b.d.	b.d.	b.d.	b.d.	b.d.	n.m.	-
Tb	b.d.	b.d.	b.d.	b.d.	b.d.	b.d.		b.d.	b.d.	b.d.	b.d.	b.d.	b.d.	b.d.	b.d.	n.m.	-
Dy	b.d.	b.d.	b.d.	b.d.	b.d.	b.d.		b.d.	b.d.	b.d.	b.d.	b.d.	b.d.	b.d.	b.d.	n.m.	-
Y	0.07	0.07	0.05	0.06	0.07	0.09		0.16	0.24	0.16	0.1	0.1	0.22	0.1	0.07	n.m.	-
Ho	b.d.	b.d.	b.d.	b.d.	b.d.	b.d.		b.d.	b.d.	b.d.	b.d.	b.d.	b.d.	b.d.	b.d.	n.m.	-
Er	b.d.	b.d.	b.d.	b.d.	b.d.	b.d.		b.d.	b.d.	b.d.	b.d.	b.d.	b.d.	b.d.	b.d.	n.m.	-
Tm	b.d.	b.d.	b.d.	b.d.	b.d.	b.d.		b.d.	b.d.	b.d.	b.d.	b.d.	b.d.	b.d.	b.d.	n.m.	-
Yb	b.d.	b.d.	b.d.	b.d.	b.d.	b.d.		b.d.	b.d.	b.d.	b.d.	b.d.	b.d.	b.d.	b.d.	n.m.	-
Lu	b.d.	b.d.	b.d.	b.d.	b.d.	b.d.		b.d.	b.d.	b.d.	b.d.	b.d.	b.d.	b.d.	b.d.	n.m.	-
Pb	0.23	0.08	0.19	0.05	0.18	0.29		0.27	0.2	0.11	0.17	0.08	0.1	b.d.	0.06	n.m.	-
PGE (ppb)
Os	17.8	16.8	13.8	5.67	24	21.5		66.4	143	72.9	29.4	35.5	33.6	32.3	29.3	8.75	9.6
Ir	14.8	11	10.2	3.12	11.7	9.18		43.4	68.7	32.7	14.7	25.6	17.3	19.9	22.4	4.74	4.3
Ru	13.1	18.9	35.6	5.04	16	15.3		60.8	84.7	46.9	51.4	83.1	50	60.1	53.7	12.2	14.7
Rh	2.44	2.87	4.61	0.92	2.6	2.26		9.02	12.3	6.34	8.91	11.3	7.75	12.9	9.85	1.29	1.3
Pt	0.75	1.07	1.19	1.14	0.6	1.3		3.5	5.9	0.68	1.62	1.5	0.86	3.58	1.22	5.94	6.4
Pd	0.7	0.75	1.82	0.87	0.55	1.06		4.31	3.95	0.56	5.65	3.35	0.71	5.58	0.88	4.22	4.6
